# Supplementary material for: A structural and catalytic model for zinc phosphoesterases
Source: Royal Society of Chemistry journal article supplement (doi:10.1039/b806391e), 2008-01-01
Supplement: b806391e.pdf [file b806391e.pdf]

**Supplementary Material for the manuscript**

**A Structural and catalytic model for zinc phosphoesterases**

**Rebecca R. Buchholz,<sup>1</sup> Morgan E. Etienne,<sup>1</sup> Anneke Dorgelo,<sup>1</sup> Ruth E. Mirams,<sup>1</sup> Sarah J. Smith,<sup>1</sup> Shiao Chow,<sup>1</sup> Lyall R. Hanton,<sup>2</sup>  
Geoffrey B. Jameson,<sup>3</sup> Gerhard Schenk<sup>1</sup> and Lawrence R. Gahan<sup>1</sup>**

1. School of Molecular and Microbial Sciences, The University of Queensland, QLD, AUSTRALIA 4072
2. Department of Chemistry, Te Tari Hua-Ruanuku, University of Otago, PO Box 56, Dunedin, NEW ZEALAND
3. Massey University, Palmerston North Campus, Private Bag 11222, Palmerston North 5301, NEW ZEALAND

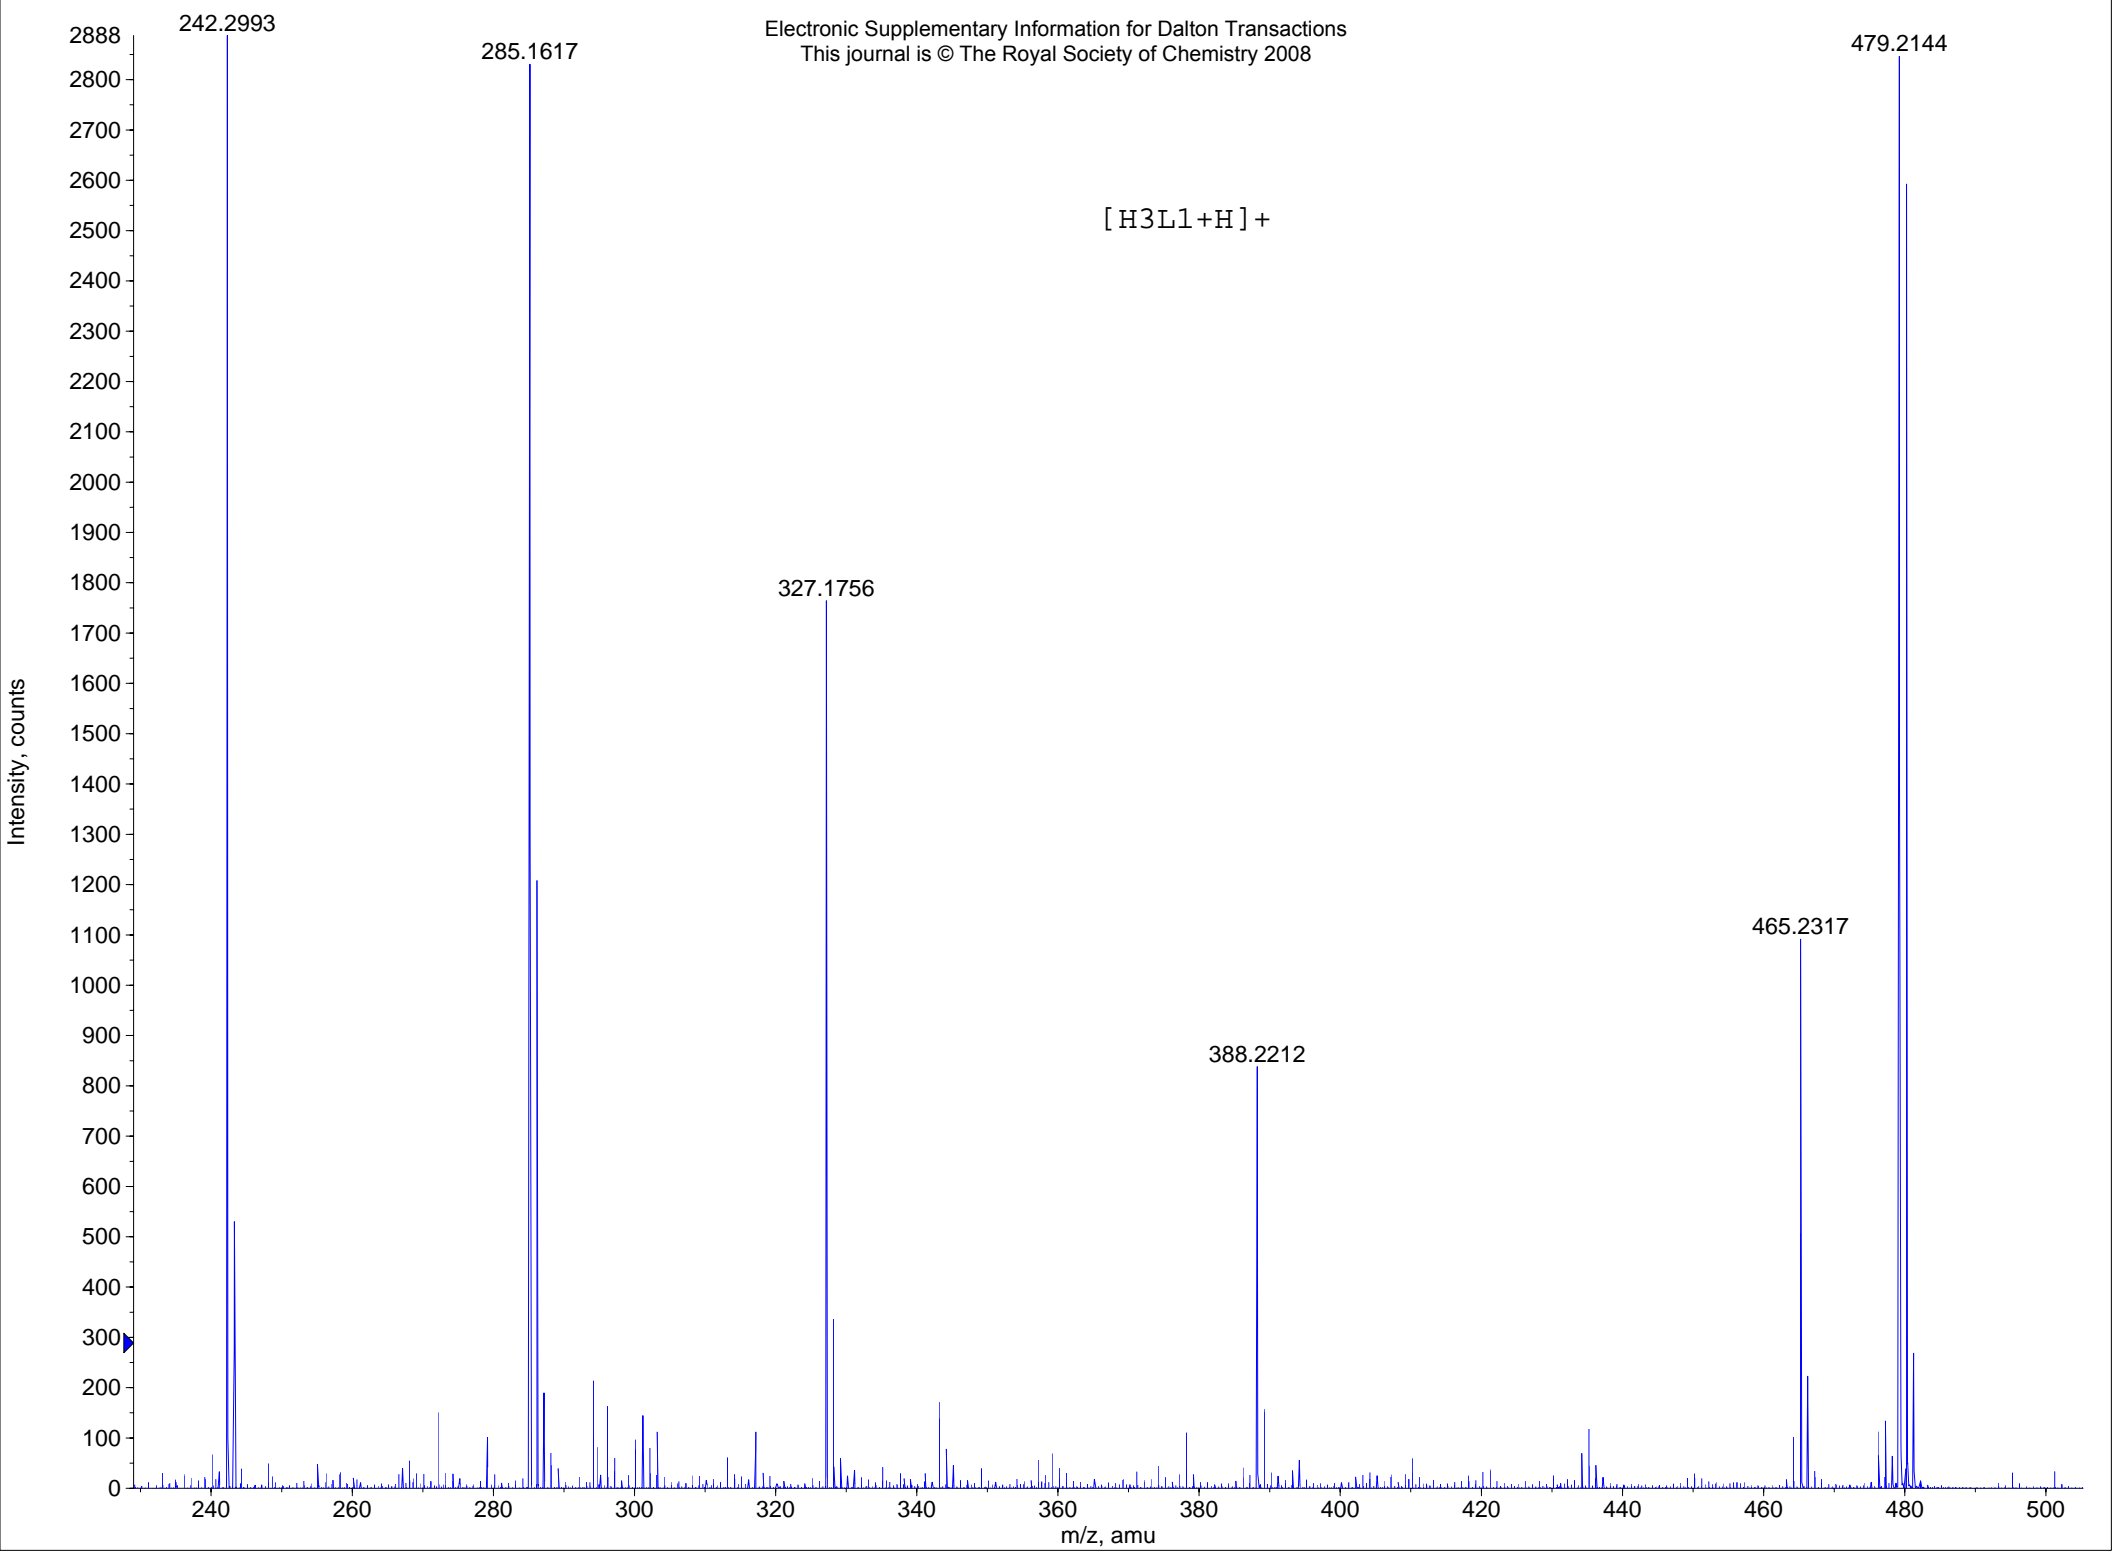

Electronic Supplementary Information for Dalton Transactions  
This journal is © The Royal Society of Chemistry 2008

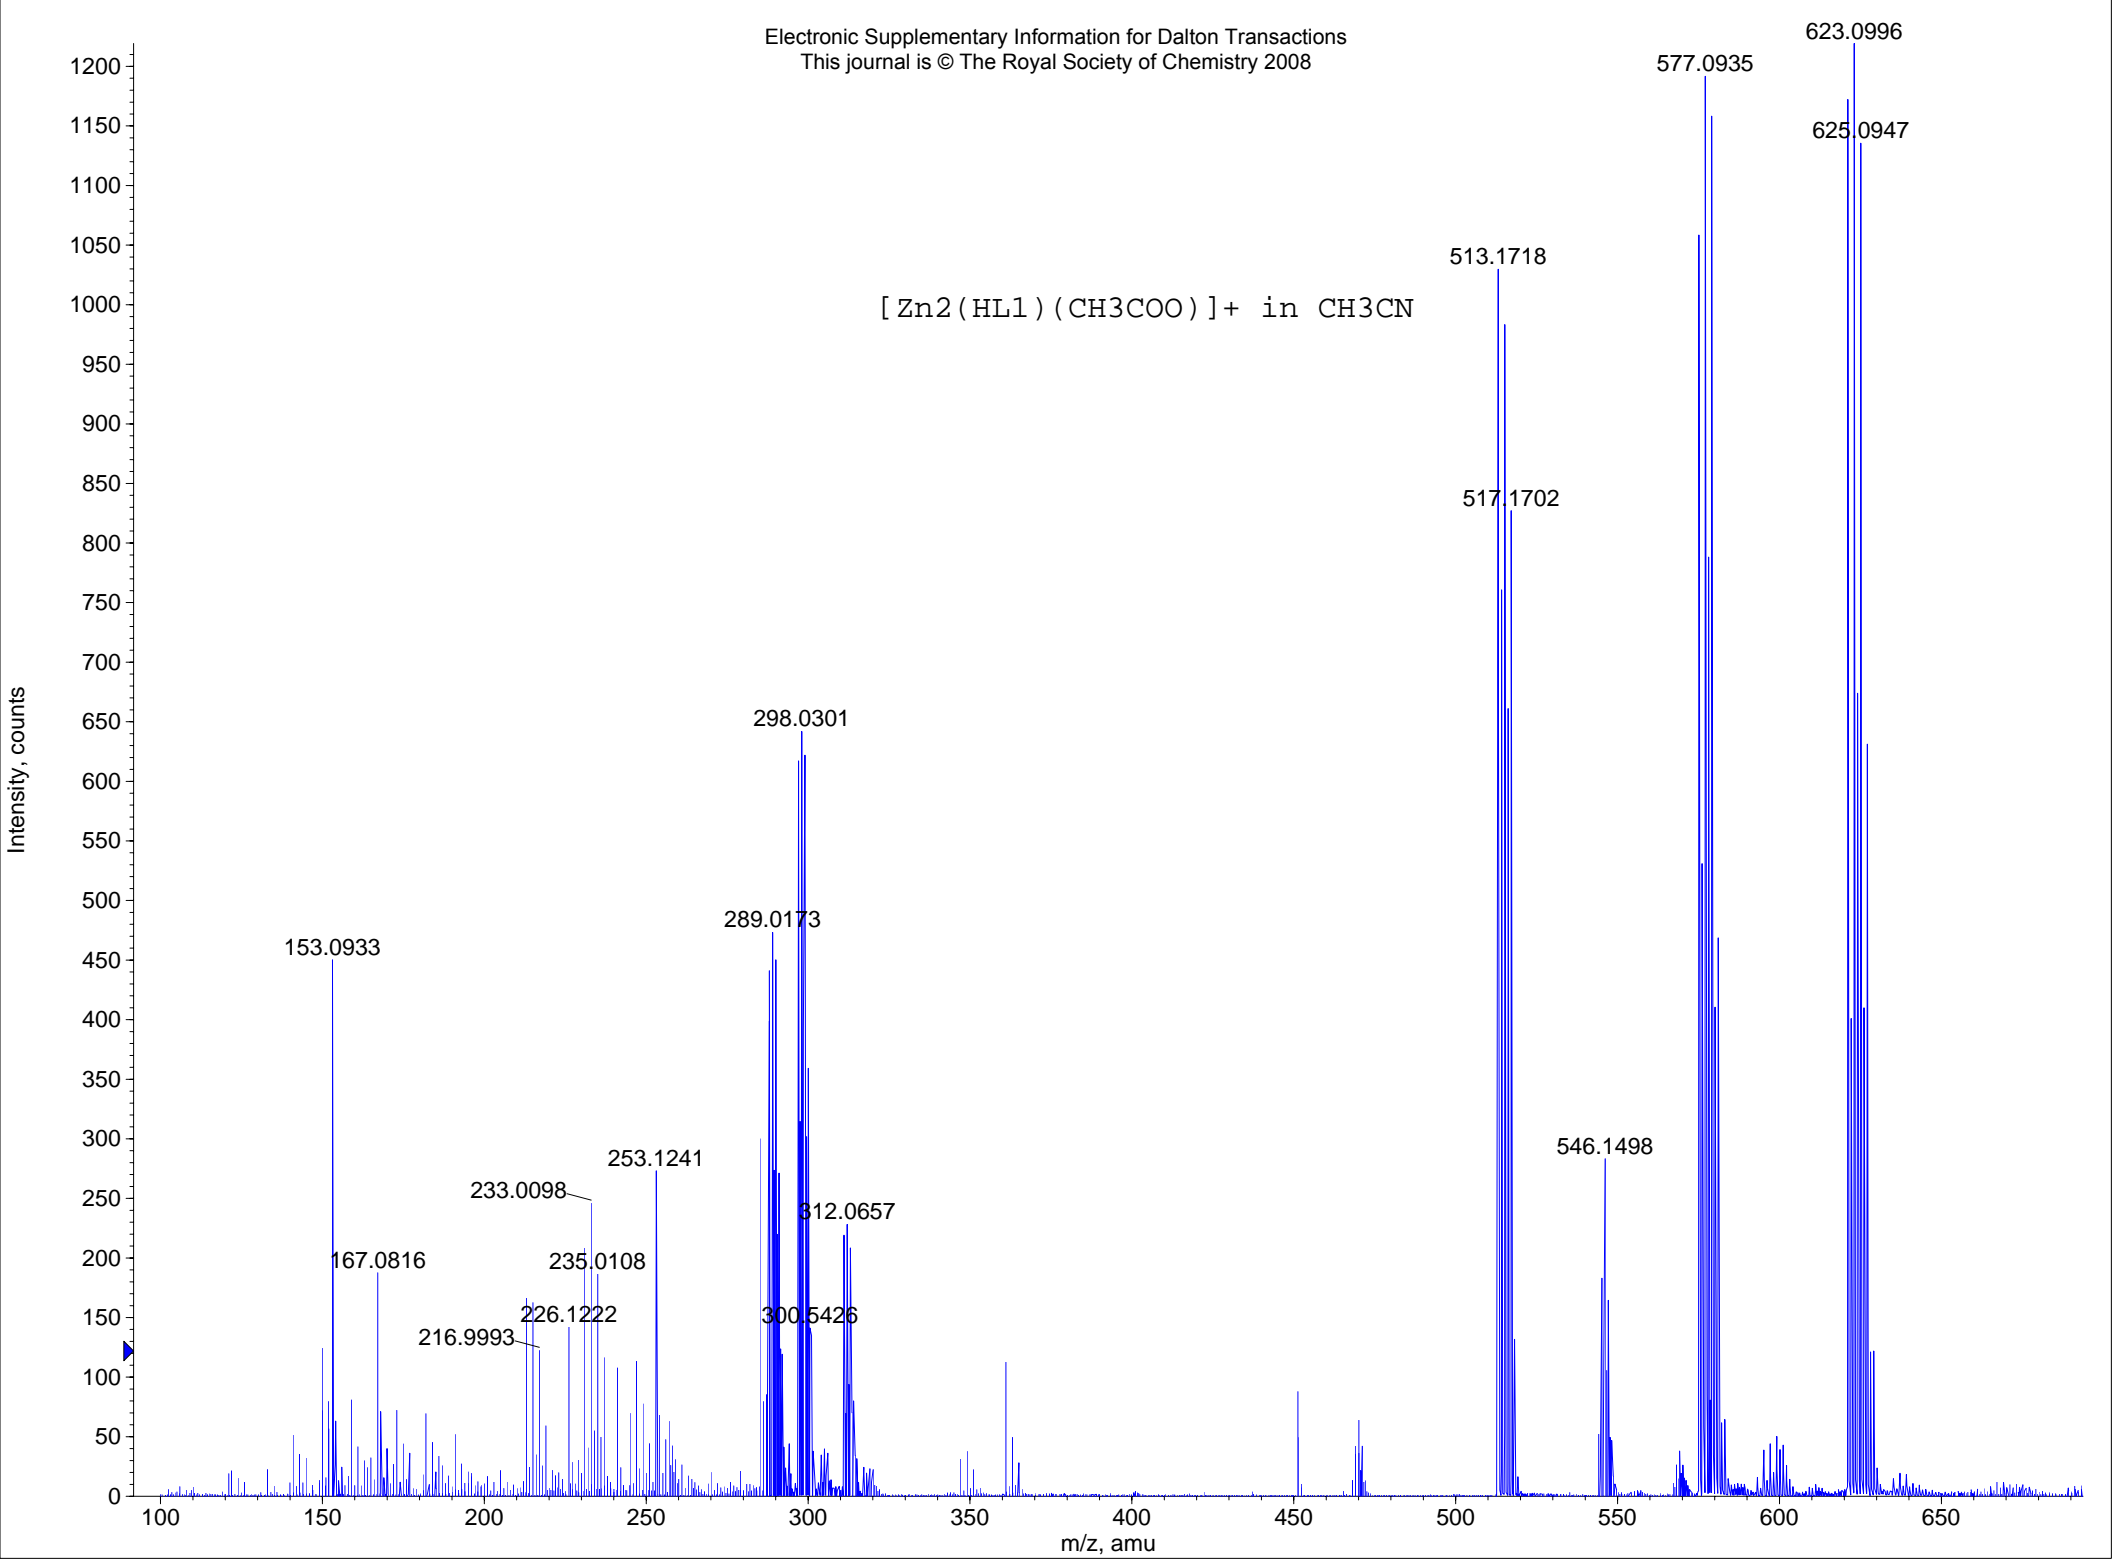

Electronic Supplementary Information for Dalton Transactions  
This journal is © The Royal Society of Chemistry 2008

[Zn<sub>2</sub>(HL1)(CH<sub>3</sub>COO)]<sup>+</sup> in acetonitrile/water (10/90)

Intensity, counts

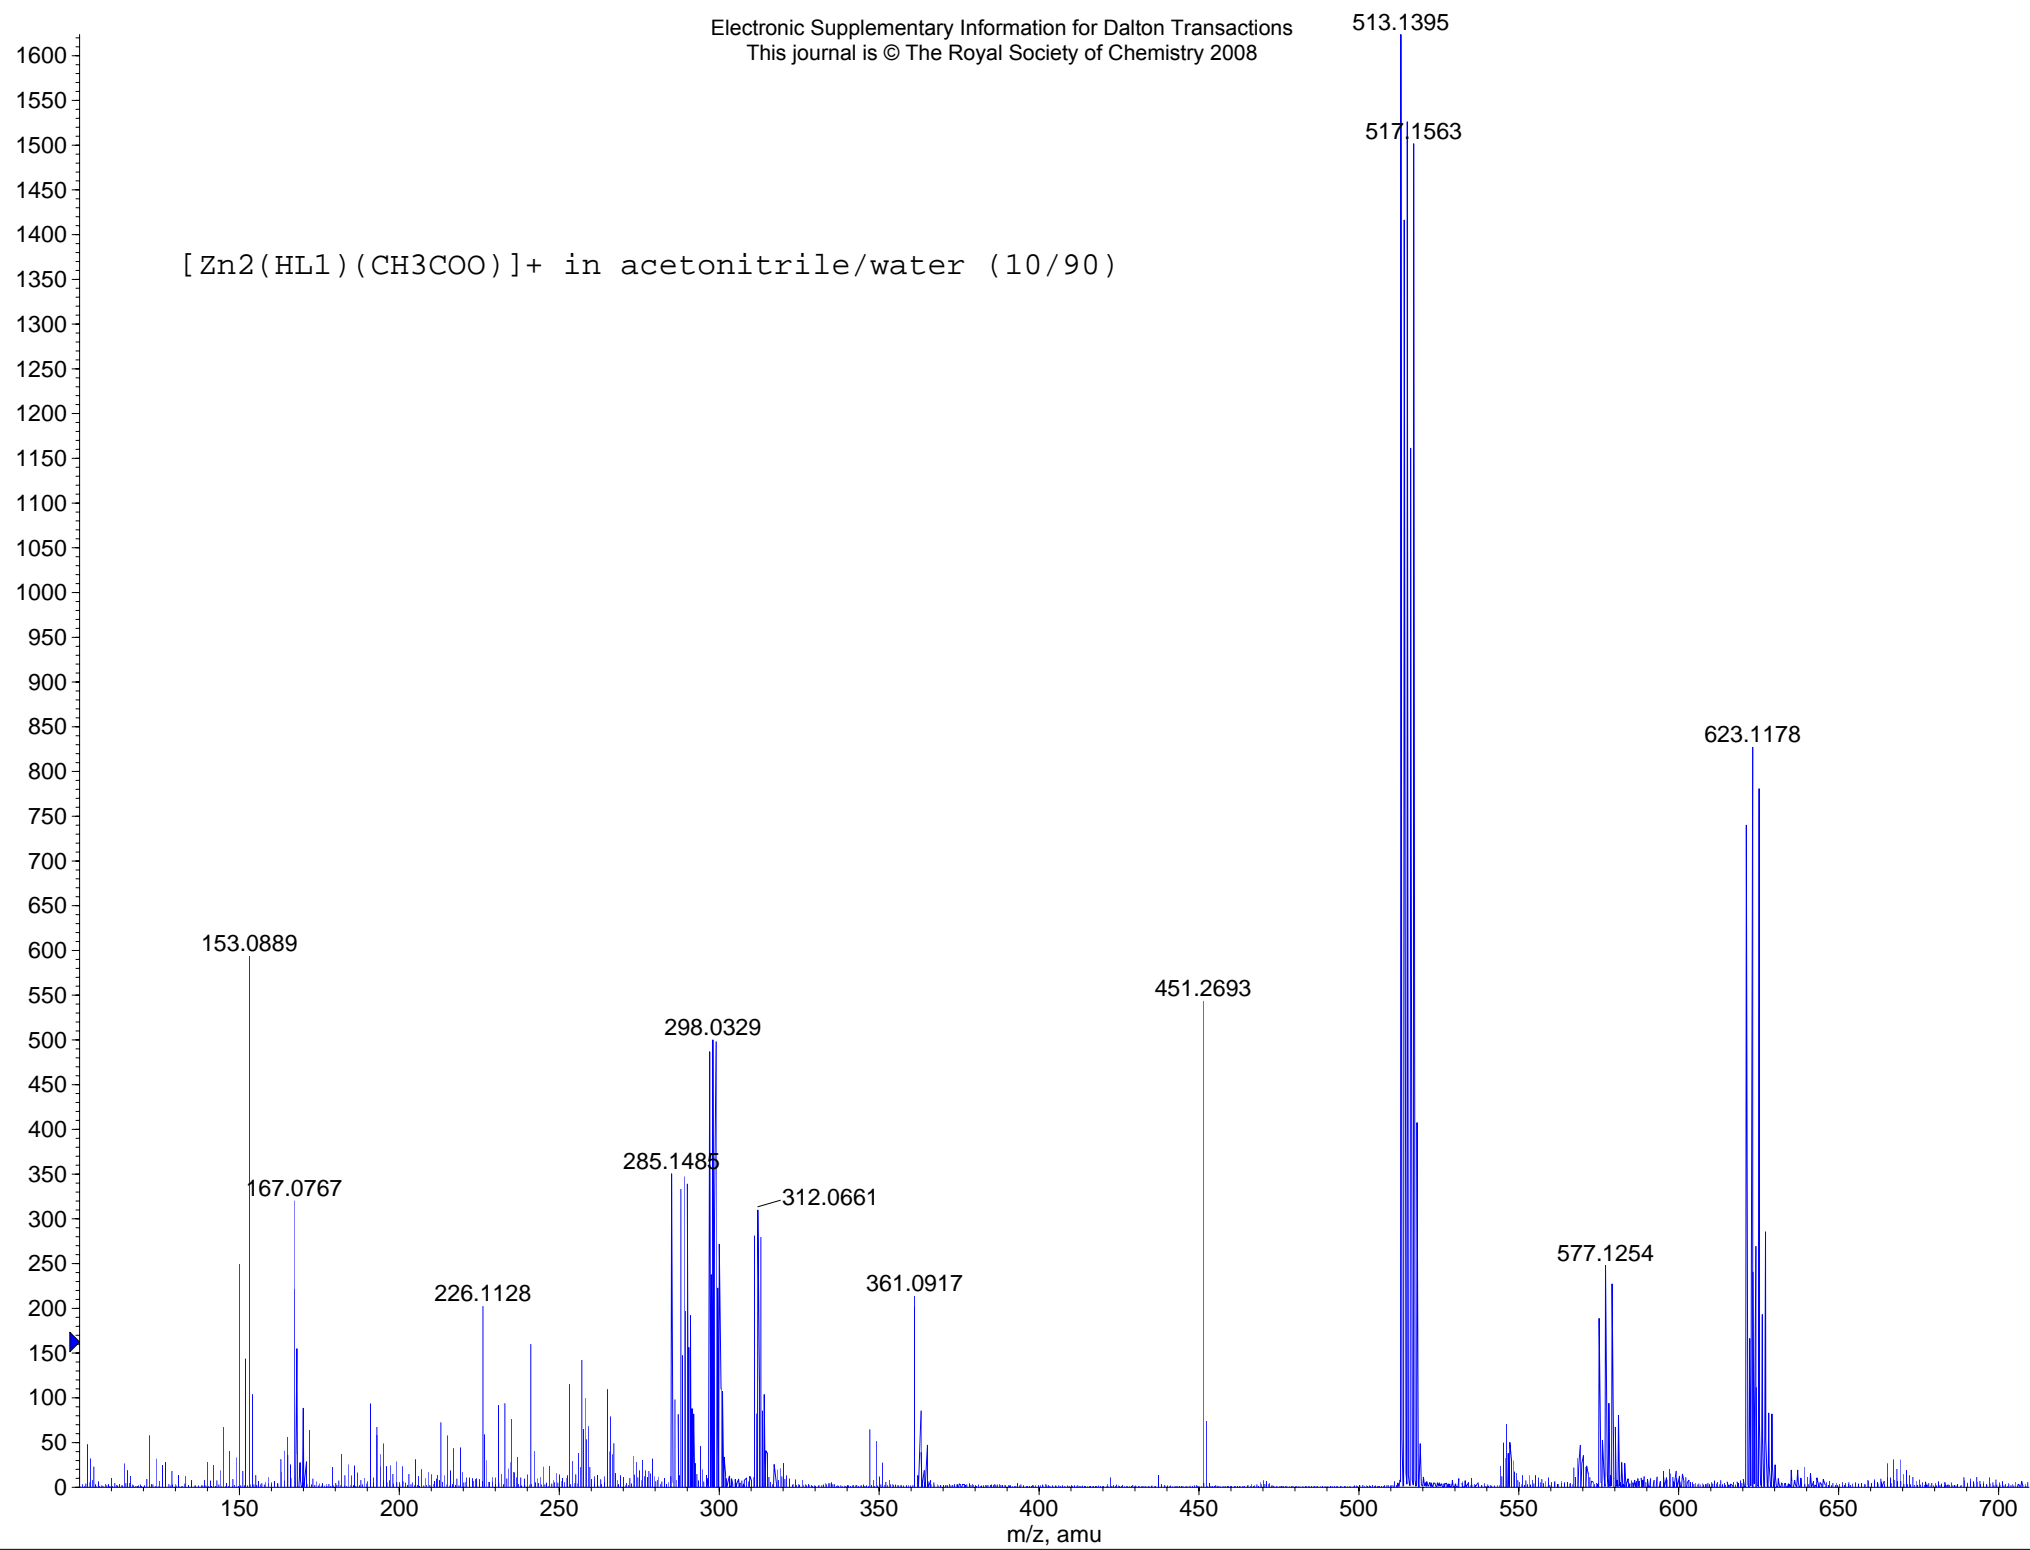

Calculated mass spectrum for  $[\text{Zn}_2(\text{C}_{25}\text{H}_{28}\text{N}_4\text{O}_4)(\text{CH}_3\text{COO})(\text{H}_2\text{O})_6]^+$   
(743.14, 80.64; 745.14, 98.46; 747.14, 100.00; 748.14, 38.19%)

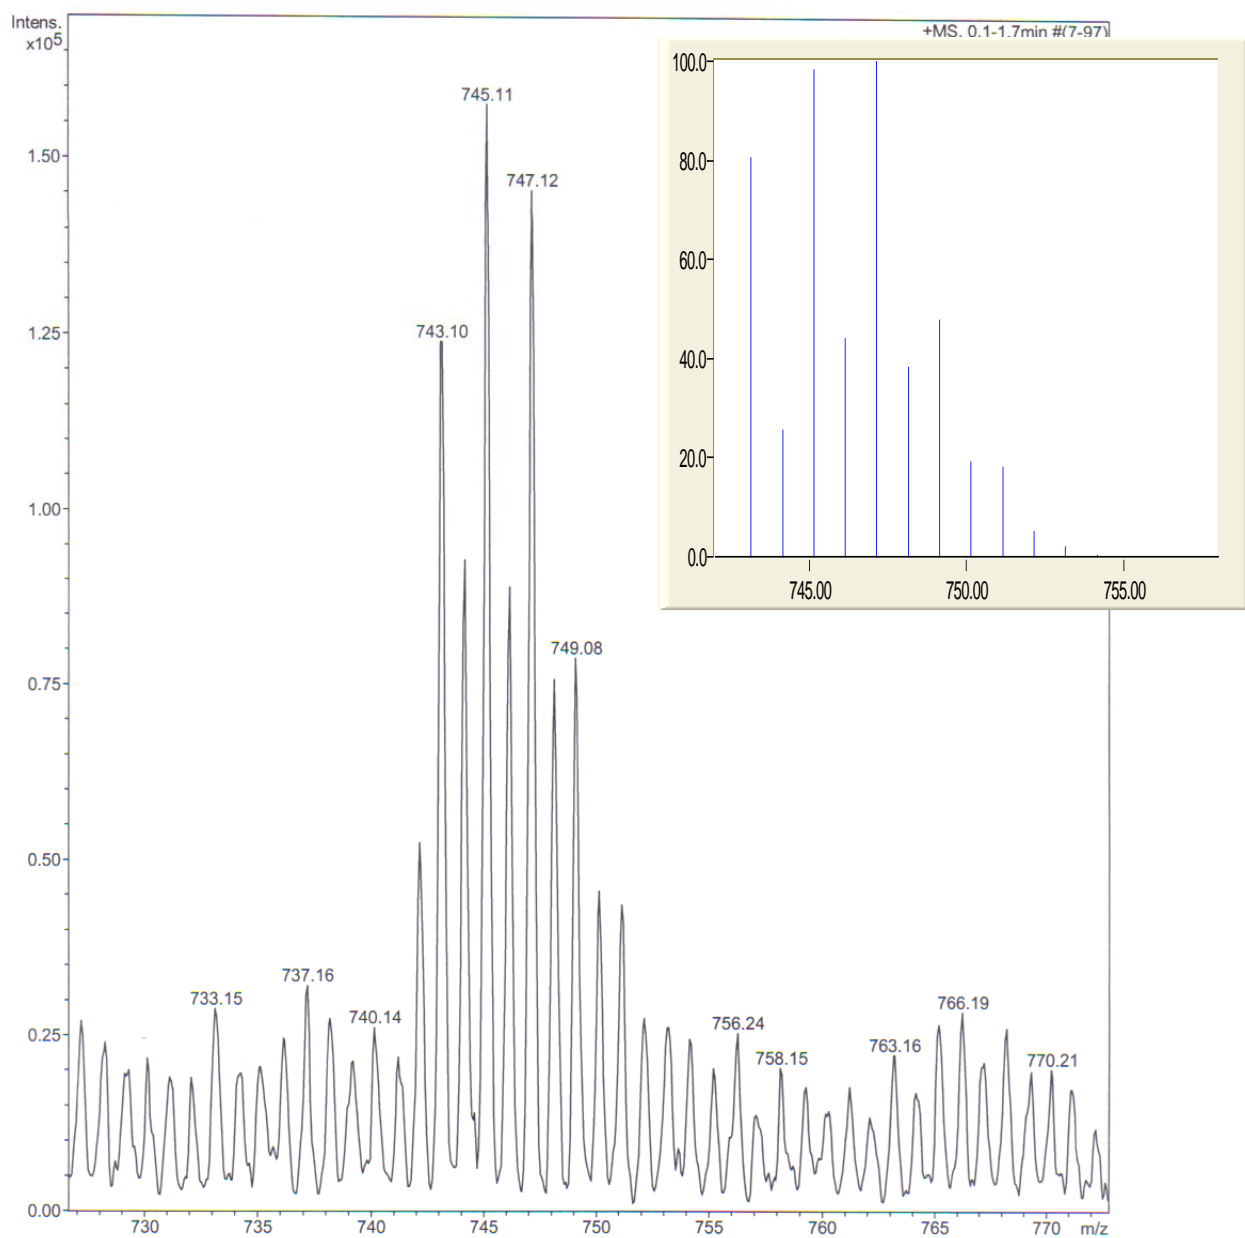

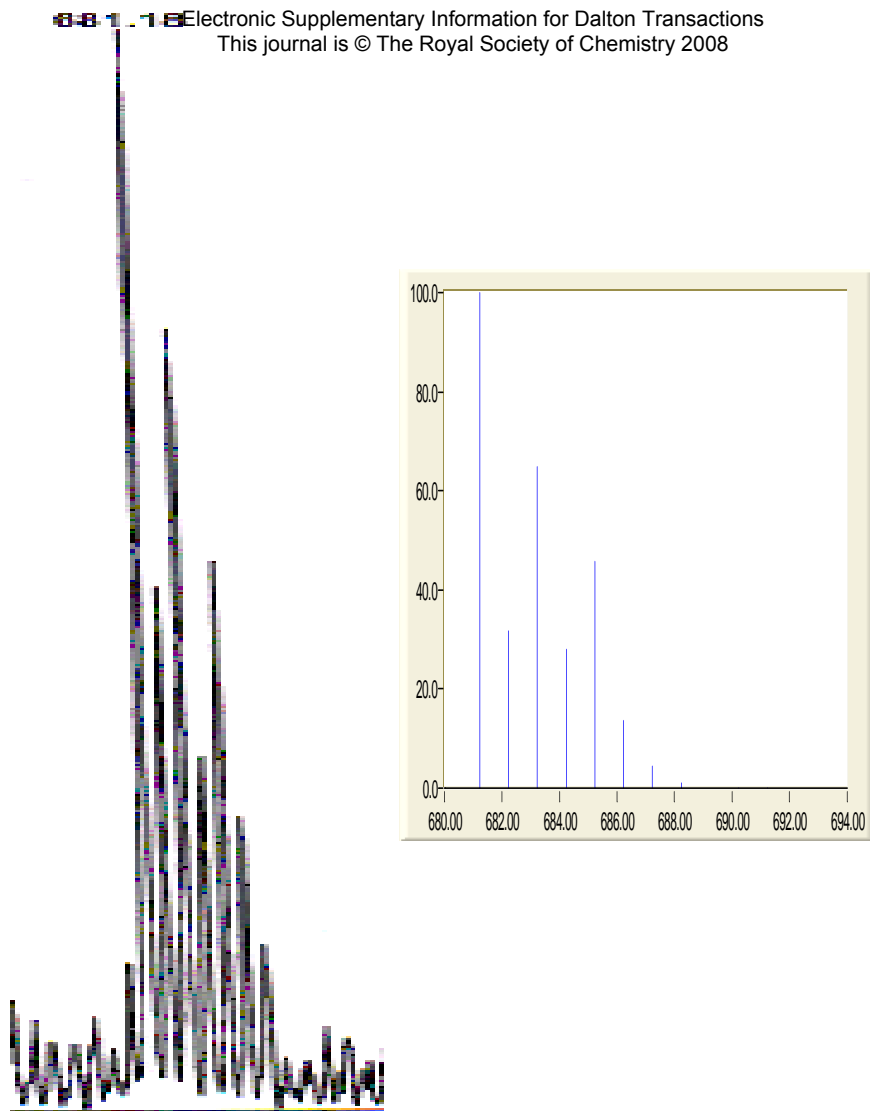

Calculated mass spectrum for  $[\text{Zn}(\text{C}_{25}\text{H}_{28}\text{N}_4\text{O}_4)(\text{CH}_3\text{COO})(\text{H}_2\text{O})_6+2\text{H}]^+$  (681.23, 100.00; 682.23, 31.81; 683.23, 64.74%)
